# Supplementary material
Source: publisher figshare collection journal article supplement (https://gsajournals.figshare.com/ndownloader/files/12349475)
Supplement: Supplementary file 1 [file 12349475]

## Sheet: Sheet1
Sleep trait	Progenitor selection scheme	Progenitor replicate population	Source	d.f.	MS	F	P
Night sleep (min.)	long	1	sex	1	42000.8	18.7	0.001
Night sleep (min.)	long	1	line	10	3261.66	1.5	0.268
Night sleep (min.)	long	1	rep	1	1459.18	2.67	0.1365
Night sleep (min.)	long	1	sex×rep	1	602.868	1.1	0.3208
Night sleep (min.)	long	1	sex×line	10	2180.66	7.1	0.1523
Night sleep (min.)	long	1	line×rep	9	1665.28	3.05	0.0559
Night sleep (min.)	long	1	sex×line×rep	9	545.482	0.38	0.9459
Night sleep (min.)	long	1	error	731	1444.31	--	--
Night sleep (min.)	long	2	sex	1	40209.7	4.2	0.0698
Night sleep (min.)	long	2	line	9	25862.5	2.55	0.0897
Night sleep (min.)	long	2	rep	1	5668.28	1.94	0.2006
Night sleep (min.)	long	2	sex×rep	1	2552.25	0.88	0.3767
Night sleep (min.)	long	2	sex×line	9	10141.4	3.35	0.102
Night sleep (min.)	long	2	line×rep	8	11697.3	4.01	0.033
Night sleep (min.)	long	2	sex×line×rep	8	2914.45	1.13	0.3386
Night sleep (min.)	long	2	error	720	2572.65	--	--
Night sleep (min.)	short	1	sex	1	401433	4.94	0.0503
Night sleep (min.)	short	1	line	10	403545	4.87	0.0098
Night sleep (min.)	short	1	rep	1	15994.3	0.82	0.3879
Night sleep (min.)	short	1	sex×rep	1	21860.9	1.12	0.3165
Night sleep (min.)	short	1	sex×line	10	82786.4	4.24	0.0384
Night sleep (min.)	short	1	line×rep	9	10989.6	0.57	0.7958
Night sleep (min.)	short	1	sex×line×rep	9	19439.7	1.03	0.4134
Night sleep (min.)	short	1	error	667	18856.2	--	--
Night sleep (min.)	short	2	sex	1	366.302	0.01	0.9245
Night sleep (min.)	short	2	line	10	72661.3	1.8	0.1843
Night sleep (min.)	short	2	rep	1	18451.7	1.58	0.2404
Night sleep (min.)	short	2	sex×rep	1	20733.6	1.77	0.2155
Night sleep (min.)	short	2	sex×line	10	40394.6	3.4	0.0786
Night sleep (min.)	short	2	line×rep	9	13856.4	1.19	0.4019
Night sleep (min.)	short	2	sex×line×rep	9	11685.8	1.07	0.3866
Night sleep (min.)	short	2	error	719	10972.5	--	--
Day avg. bout length (min.)	long	1	sex	1	232925	179.53	<.0001
Day avg. bout length (min.)	long	1	line	10	2861.22	2.09	0.1304
Day avg. bout length (min.)	long	1	rep	1	5.19565	0	0.9613
Day avg. bout length (min.)	long	1	sex×rep	1	4022.09	1.92	0.1989
Day avg. bout length (min.)	long	1	sex×line	10	1369.03	0.6	0.7722
Day avg. bout length (min.)	long	1	line×rep	9	2239.98	1.07	0.4606
Day avg. bout length (min.)	long	1	sex×line×rep	9	2092.95	1.45	0.1622
Day avg. bout length (min.)	long	1	error	731	1442.11	--	--
Day avg. bout length (min.)	long	2	sex	1	47241.8	14.29	0.0046
Day avg. bout length (min.)	long	2	line	9	2141.46	0.6	0.7742
Day avg. bout length (min.)	long	2	rep	1	468.815	0.28	0.6085
Day avg. bout length (min.)	long	2	sex×rep	1	160.768	0.1	0.7629
Day avg. bout length (min.)	long	2	sex×line	9	3597.25	1.9	0.2258
Day avg. bout length (min.)	long	2	line×rep	8	2054.78	1.24	0.3821
Day avg. bout length (min.)	long	2	sex×line×rep	8	1650.64	1.79	0.0763
Day avg. bout length (min.)	long	2	error	720	923.626	--	--
Day avg. bout length (min.)	short	1	sex	1	12056.5	38.55	0.0002
Day avg. bout length (min.)	short	1	line	10	1963.91	5.77	0.0053
Day avg. bout length (min.)	short	1	rep	1	1398.51	1.99	0.1915
Day avg. bout length (min.)	short	1	sex×rep	1	429.656	0.61	0.4539
Day avg. bout length (min.)	short	1	sex×line	10	340.385	0.45	0.8838
Day avg. bout length (min.)	short	1	line×rep	9	352.698	0.5	0.8401
Day avg. bout length (min.)	short	1	sex×line×rep	9	701.951	2	0.0364
Day avg. bout length (min.)	short	1	error	667	350.121	--	--
Day avg. bout length (min.)	short	2	sex	1	9626.61	100.7	<.0001
Day avg. bout length (min.)	short	2	line	10	189.087	1.85	0.1729
Day avg. bout length (min.)	short	2	rep	1	28.0013	0.22	0.647
Day avg. bout length (min.)	short	2	sex×rep	1	60.5311	0.48	0.5037
Day avg. bout length (min.)	short	2	sex×line	10	102.117	0.74	0.676
Day avg. bout length (min.)	short	2	line×rep	9	104.342	0.84	0.6035
Day avg. bout length (min.)	short	2	sex×line×rep	9	124.916	1.57	0.1217
Day avg. bout length (min.)	short	2	error	714	79.8019	--	--
Night avg. bout length (min.)	long	1	sex	1	1.55159e+06	15.41	0.0026
Night avg. bout length (min.)	long	1	line	10	70017.7	0.68	0.7254
Night avg. bout length (min.)	long	1	rep	1	101499	3.05	0.1147
Night avg. bout length (min.)	long	1	sex×rep	1	10181.9	0.31	0.5937
Night avg. bout length (min.)	long	1	sex×line	10	103366	3.27	0.0999
Night avg. bout length (min.)	long	1	line×rep	9	69077.7	2.07	0.146
Night avg. bout length (min.)	long	1	sex×line×rep	9	33293.7	0.84	0.5805
Night avg. bout length (min.)	long	1	error	731	39697.1	--	--
Night avg. bout length (min.)	long	2	sex	1	1.31021e+06	8.41	0.0182
Night avg. bout length (min.)	long	2	line	9	268094	1.58	0.254
Night avg. bout length (min.)	long	2	rep	1	2873.78	0.05	0.8256
Night avg. bout length (min.)	long	2	sex×rep	1	1967.62	0.04	0.8553
Night avg. bout length (min.)	long	2	sex×line	9	169973	2.61	0.1237
Night avg. bout length (min.)	long	2	line×rep	8	131252	2.37	0.1221
Night avg. bout length (min.)	long	2	sex×line×rep	8	55444.5	2.09	0.0343
Night avg. bout length (min.)	long	2	error	720	26489.9	--	--
Night avg. bout length (min.)	short	1	sex	1	914.373	0.19	0.6754
Night avg. bout length (min.)	short	1	line	10	12247.8	2.43	0.089
Night avg. bout length (min.)	short	1	rep	1	5237.16	3.01	0.1168
Night avg. bout length (min.)	short	1	sex×rep	1	7012.37	4.03	0.0756
Night avg. bout length (min.)	short	1	sex×line	10	5044.85	2.72	0.092
Night avg. bout length (min.)	short	1	line×rep	9	2487.86	1.43	0.3019
Night avg. bout length (min.)	short	1	sex×line×rep	9	1741.77	1.59	0.1135
Night avg. bout length (min.)	short	1	error	658	1093.52	--	--
Night avg. bout length (min.)	short	2	sex	1	2015.92	2.38	0.1549
Night avg. bout length (min.)	short	2	line	10	850.383	0.95	0.5298
Night avg. bout length (min.)	short	2	rep	1	159.326	0.25	0.6272
Night avg. bout length (min.)	short	2	sex×rep	1	98.3969	0.16	0.702
Night avg. bout length (min.)	short	2	sex×line	10	892.562	1.3	0.3769
Night avg. bout length (min.)	short	2	line×rep	9	828.441	1.31	0.3457
Night avg. bout length (min.)	short	2	sex×line×rep	9	630.904	1.48	0.1515
Night avg. bout length (min.)	short	2	error	678	426.49	--	--
Day bout number	long	1	sex	1	15695.6	160.69	<.0001
Day bout number	long	1	line	10	149.89	1.47	0.2768
Day bout number	long	1	rep	1	322.039	10.68	0.0097
Day bout number	long	1	sex×rep	1	24.5827	0.82	0.3901
Day bout number	long	1	sex×line	10	101.96	3.31	0.0805
Day bout number	long	1	line×rep	9	117.604	3.9	0.0276
Day bout number	long	1	sex×line×rep	9	30.1583	1.09	0.3664
Day bout number	long	1	error	731	27.6246	--	--
Day bout number	long	2	sex	1	15705.6	87.86	<.0001
Day bout number	long	2	line	9	432.062	2.21	0.1267
Day bout number	long	2	rep	1	126.645	1.36	0.2772
Day bout number	long	2	sex×rep	1	2.63038	0.03	0.8707
Day bout number	long	2	sex×line	9	195.571	1.81	0.2413
Day bout number	long	2	line×rep	8	183.593	1.97	0.1784
Day bout number	long	2	sex×line×rep	8	93.159	1.95	0.0506
Day bout number	long	2	error	720	47.8487	--	--
Day bout number	short	1	sex	1	324.088	3.02	0.1141
Day bout number	short	1	line	10	503.406	4.51	0.013
Day bout number	short	1	rep	1	740.649	9.46	0.0132
Day bout number	short	1	sex×rep	1	25.025	0.32	0.5857
Day bout number	short	1	sex×line	10	111.669	1.32	0.3592
Day bout number	short	1	line×rep	9	30.9594	0.39	0.9087
Day bout number	short	1	sex×line×rep	9	78.3816	1.82	0.0615
Day bout number	short	1	error	667	43.0584	--	--
Day bout number	short	2	sex	1	3765.11	33.26	0.0002
Day bout number	short	2	line	10	341.813	2.77	0.0616
Day bout number	short	2	rep	1	9.19884	0.09	0.7681
Day bout number	short	2	sex×rep	1	331.723	3.33	0.1012
Day bout number	short	2	sex×line	10	123.272	1.08	0.4709
Day bout number	short	2	line×rep	9	51.514	0.52	0.8301
Day bout number	short	2	sex×line×rep	9	99.6634	2.11	0.0267
Day bout number	short	2	error	719	47.2418	--	--
Night bout number	long	1	sex	1	2057.73	38.1	<.0001
Night bout number	long	1	line	10	87.0096	1.59	0.2384
Night bout number	long	1	rep	1	29.1845	1.13	0.3152
Night bout number	long	1	sex×rep	1	0.340074	0.01	0.9111
Night bout number	long	1	sex×line	10	54.7398	2.23	0.192
Night bout number	long	1	line×rep	9	43.8587	1.7	0.2206
Night bout number	long	1	sex×line×rep	9	25.7953	0.84	0.577
Night bout number	long	1	error	731	30.6177	--	--
Night bout number	long	2	sex	1	463.911	3.66	0.0872
Night bout number	long	2	line	9	399.312	2.98	0.06
Night bout number	long	2	rep	1	35.2638	1.32	0.2837
Night bout number	long	2	sex×rep	1	109.167	4.09	0.0778
Night bout number	long	2	sex×line	9	134.186	5.09	0.0563
Night bout number	long	2	line×rep	8	143.207	5.36	0.0143
Night bout number	long	2	sex×line×rep	8	26.7052	0.96	0.4653
Night bout number	long	2	error	720	27.7844	--	--
Night bout number	short	1	sex	1	2819.95	76.71	<.0001
Night bout number	short	1	line	10	192.064	4.73	0.0109
Night bout number	short	1	rep	1	20.317	0.26	0.6256
Night bout number	short	1	sex×rep	1	111.904	1.41	0.2662
Night bout number	short	1	sex×line	10	40.5691	0.46	0.8741
Night bout number	short	1	line×rep	9	16.6475	0.21	0.9856
Night bout number	short	1	sex×line×rep	9	79.7048	2.37	0.0121
Night bout number	short	1	error	667	33.6122	--	--
Night bout number	short	2	sex	1	710.664	7.56	0.0201
Night bout number	short	2	line	10	242.299	2.49	0.0836
Night bout number	short	2	rep	1	40.3621	0.92	0.3624
Night bout number	short	2	sex×rep	1	97.2274	2.22	0.1706
Night bout number	short	2	sex×line	10	97.4932	2.16	0.1821
Night bout number	short	2	line×rep	9	32.2446	0.73	0.6731
Night bout number	short	2	sex×line×rep	9	43.8778	1.12	0.3449
Night bout number	short	2	error	719	39.1345	--	--
Day sleep (min.)	long	1	sex	1	4.78716e+06	261.02	<.0001
Day sleep (min.)	long	1	line	10	97849.9	5.03	0.0088
Day sleep (min.)	long	1	rep	1	149598	10.11	0.0112
Day sleep (min.)	long	1	sex×rep	1	146337	9.89	0.0118
Day sleep (min.)	long	1	sex×line	10	19461.5	1.2	0.4181
Day sleep (min.)	long	1	line×rep	9	15977	1.08	0.4555
Day sleep (min.)	long	1	sex×line×rep	9	14797.3	1.53	0.1328
Day sleep (min.)	long	1	error	731	9664.53	--	--
Day sleep (min.)	long	2	sex	1	701914	11.15	0.0081
Day sleep (min.)	long	2	line	9	266374	4.03	0.025
Day sleep (min.)	long	2	rep	1	1786.55	0.26	0.6264
Day sleep (min.)	long	2	sex×rep	1	332.991	0.05	0.8325
Day sleep (min.)	long	2	sex×line	9	66144.4	12.06	0.0391
Day sleep (min.)	long	2	line×rep	8	27932.8	4.01	0.0332
Day sleep (min.)	long	2	sex×line×rep	8	6972.97	0.61	0.7699
Day sleep (min.)	long	2	error	720	11431.3	--	--
Day sleep (min.)	short	1	sex	1	2.5558e+06	122.73	<.0001
Day sleep (min.)	short	1	line	10	290119	13.66	0.0001
Day sleep (min.)	short	1	rep	1	49781.2	3.93	0.0786
Day sleep (min.)	short	1	sex×rep	1	885.886	0.07	0.7973
Day sleep (min.)	short	1	sex×line	10	21244.3	1.63	0.2679
Day sleep (min.)	short	1	line×rep	9	6780.66	0.54	0.8171
Day sleep (min.)	short	1	sex×line×rep	9	12665.1	1.21	0.2834
Day sleep (min.)	short	1	error	667	10437.8	--	--
Day sleep (min.)	short	2	sex	1	2.89486e+06	90.57	<.0001
Day sleep (min.)	short	2	line	10	135127	3.96	0.0202
Day sleep (min.)	short	2	rep	1	9707.09	0.49	0.5014
Day sleep (min.)	short	2	sex×rep	1	114989	5.81	0.0392
Day sleep (min.)	short	2	sex×line	10	34082.8	1.54	0.2917
Day sleep (min.)	short	2	line×rep	9	2775.32	0.14	0.9963
Day sleep (min.)	short	2	sex×line×rep	9	19810.7	1.72	0.0799
Day sleep (min.)	short	2	error	719	11492.2	--	--
24-hour sleep (min.)	long	1	sex	1	5.72597e+06	324.32	<.0001
24-hour sleep (min.)	long	1	line	10	112128	6.12	0.0042
24-hour sleep (min.)	long	1	rep	1	121508	6.79	0.0284
24-hour sleep (min.)	long	1	sex×rep	1	128155	7.16	0.0253
24-hour sleep (min.)	long	1	sex×line	10	18331.2	0.97	0.5389
24-hour sleep (min.)	long	1	line×rep	9	20452	1.14	0.4227
24-hour sleep (min.)	long	1	sex×line×rep	9	17893.6	1.27	0.2476
24-hour sleep (min.)	long	1	error	731	14050.2	--	--
24-hour sleep (min.)	long	2	sex	1	406126	3.73	0.0842
24-hour sleep (min.)	long	2	line	9	388185	3.39	0.0417
24-hour sleep (min.)	long	2	rep	1	13819.3	1.63	0.2372
24-hour sleep (min.)	long	2	sex×rep	1	1041.47	0.12	0.7349
24-hour sleep (min.)	long	2	sex×line	9	114548	20.31	0.0483
24-hour sleep (min.)	long	2	line×rep	8	68880.3	8.14	0.0038
24-hour sleep (min.)	long	2	sex×line×rep	8	8464.56	0.5	0.8566
24-hour sleep (min.)	long	2	error	720	16928.5	--	--
24-hour sleep (min.)	short	1	sex	1	931416	13.17	0.0043
24-hour sleep (min.)	short	1	line	10	1.2224e+06	17.25	<.0001
24-hour sleep (min.)	short	1	rep	1	9340.9	0.26	0.6227
24-hour sleep (min.)	short	1	sex×rep	1	13945.3	0.39	0.5491
24-hour sleep (min.)	short	1	sex×line	10	70865.2	2.03	0.1972
24-hour sleep (min.)	short	1	line×rep	9	30821.7	0.86	0.5895
24-hour sleep (min.)	short	1	sex×line×rep	9	35997.8	0.85	0.5704
24-hour sleep (min.)	short	1	error	667	42366.5	--	--
24-hour sleep (min.)	short	2	sex	1	2.96036e+06	25.93	0.0005
24-hour sleep (min.)	short	2	line	10	385913	3.2	0.0403
24-hour sleep (min.)	short	2	rep	1	1392.22	0.02	0.878
24-hour sleep (min.)	short	2	sex×rep	1	233377	4.18	0.0712
24-hour sleep (min.)	short	2	sex×line	10	120651	1.97	0.1963
24-hour sleep (min.)	short	2	line×rep	9	23507.1	0.42	0.8935
24-hour sleep (min.)	short	2	sex×line×rep	9	55893.3	1.53	0.1343
24-hour sleep (min.)	short	2	error	719	36613.8	--	--
Sleep latency (min.)	long	1	sex	1	34.9694	0.23	0.6451
Sleep latency (min.)	long	1	line	10	202.793	1.24	0.3681
Sleep latency (min.)	long	1	rep	1	618.417	6.57	0.0305
Sleep latency (min.)	long	1	sex×rep	1	131.42	1.4	0.2677
Sleep latency (min.)	long	1	sex×line	10	162.976	1.62	0.2788
Sleep latency (min.)	long	1	line×rep	9	90.2542	0.96	0.525
Sleep latency (min.)	long	1	sex×line×rep	9	94.2122	1.35	0.2069
Sleep latency (min.)	long	1	error	731	69.7424	--	--
Sleep latency (min.)	long	2	sex	1	1299.66	1.8	0.2127
Sleep latency (min.)	long	2	line	9	598.574	0.77	0.6455
Sleep latency (min.)	long	2	rep	1	1228.21	8.34	0.0202
Sleep latency (min.)	long	2	sex×rep	1	153.128	1.04	0.3376
Sleep latency (min.)	long	2	sex×line	9	773.367	4.93	0.045
Sleep latency (min.)	long	2	line×rep	8	277.389	1.88	0.1945
Sleep latency (min.)	long	2	sex×line×rep	8	147.222	1.25	0.2681
Sleep latency (min.)	long	2	error	720	117.966	--	--
Sleep latency (min.)	short	1	sex	1	1.26159e+06	57.96	<.0001
Sleep latency (min.)	short	1	line	10	54641.1	2.33	0.0987
Sleep latency (min.)	short	1	rep	1	22244.1	0.61	0.4551
Sleep latency (min.)	short	1	sex×rep	1	23142.4	0.63	0.4464
Sleep latency (min.)	short	1	sex×line	10	23411.2	0.59	0.7882
Sleep latency (min.)	short	1	line×rep	9	15371.3	0.42	0.8935
Sleep latency (min.)	short	1	sex×line×rep	9	36544.2	2.2	0.0203
Sleep latency (min.)	short	1	error	663	16592.4	--	--
Sleep latency (min.)	short	2	sex	1	952329	32.7	0.0002
Sleep latency (min.)	short	2	line	10	56418.7	1.9	0.1629
Sleep latency (min.)	short	2	rep	1	1.79591e+06	69.07	<.0001
Sleep latency (min.)	short	2	sex×rep	1	10619.7	0.41	0.5386
Sleep latency (min.)	short	2	sex×line	10	29676.8	1.11	0.4685
Sleep latency (min.)	short	2	line×rep	9	31355.7	1.21	0.3926
Sleep latency (min.)	short	2	sex×line×rep	9	26007.4	1.12	0.3485
Sleep latency (min.)	short	2	error	689	23298.1	--	--
Waking activity (cts./min.)	long	1	sex	1	27.3823	56.98	<.0001
Waking activity (cts./min.)	long	1	line	10	0.29055	0.58	0.7973
Waking activity (cts./min.)	long	1	rep	1	0.00200219	0.01	0.918
Waking activity (cts./min.)	long	1	sex×rep	1	0.000899722	0.01	0.945
Waking activity (cts./min.)	long	1	sex×line	10	0.49991	2.75	0.1177
Waking activity (cts./min.)	long	1	line×rep	9	0.324722	1.82	0.1933
Waking activity (cts./min.)	long	1	sex×line×rep	9	0.178624	1.08	0.3788
Waking activity (cts./min.)	long	1	error	731	0.16613	--	--
Waking activity (cts./min.)	long	2	sex	1	18.4141	51.38	0.0002
Waking activity (cts./min.)	long	2	line	9	1.04869	2.46	0.0982
Waking activity (cts./min.)	long	2	rep	1	0.988823	1.78	0.2192
Waking activity (cts./min.)	long	2	sex×rep	1	0.846615	1.52	0.2524
Waking activity (cts./min.)	long	2	sex×line	9	0.426498	0.63	0.7455
Waking activity (cts./min.)	long	2	line×rep	8	0.314153	0.56	0.7819
Waking activity (cts./min.)	long	2	sex×line×rep	8	0.556481	2.85	0.004
Waking activity (cts./min.)	long	2	error	720	0.194951	--	--
Waking activity (cts./min.)	short	1	sex	1	46.9153	165.59	<.0001
Waking activity (cts./min.)	short	1	line	10	2.43239	8.5	0.0011
Waking activity (cts./min.)	short	1	rep	1	0.0680066	0.44	0.5251
Waking activity (cts./min.)	short	1	sex×rep	1	0.00359139	0.02	0.8826
Waking activity (cts./min.)	short	1	sex×line	10	0.286042	1.84	0.2251
Waking activity (cts./min.)	short	1	line×rep	9	0.0966729	0.62	0.7555
Waking activity (cts./min.)	short	1	sex×line×rep	9	0.155656	0.99	0.4498
Waking activity (cts./min.)	short	1	error	667	0.157805	--	--
Waking activity (cts./min.)	short	2	sex	1	25.5199	38.2	<.0001
Waking activity (cts./min.)	short	2	line	10	0.228401	0.33	0.9533
Waking activity (cts./min.)	short	2	rep	1	0.677593	2.65	0.138
Waking activity (cts./min.)	short	2	sex×rep	1	0.0107596	0.04	0.8421
Waking activity (cts./min.)	short	2	sex×line	10	0.69572	2.62	0.126
Waking activity (cts./min.)	short	2	line×rep	9	0.477764	1.87	0.1832
Waking activity (cts./min.)	short	2	sex×line×rep	9	0.256007	1.16	0.3211
Waking activity (cts./min.)	short	2	error	719	0.221603	--	--
